# Supplementary material
Source: PubMed Central journal article supplement (PMC9077065)
Supplement: ajcr0012-1707-f12.pdf [file ajcr0012-1707-f12.pdf]

## GINS2 accelerates hepatocellular carcinoma

**Table S1.** Primer sequences used for real-time PCR (5' to 3')

| Symbol  | Primer         | Sequence (5'→3')     |
|---------|----------------|----------------------|
| GINS2   | Forward Primer | CCCTGGTTTACCCGTGGAAG |
|         | Reverse Primer | GGGAGCAGCGACATTCT    |
| E2F1    | Forward Primer | CATCAGTACCTGGCCGAGAG |
|         | Reverse Primer | CCCGGGATTTCACACCTTT  |
| GAPDH   | Forward Primer | TCGACAGTCAGCCGCATCTT |
|         | Reverse Primer | AGGCGCCCAATACGACCAA  |
| β-actin | Forward Primer | AGCGAGCATCCCCAAAGTT  |
|         | Reverse Primer | GGGCACGAAGGCTCATCATT |

**Table S2.** Information of antibodies used in present study

| Antibody | Catalog    | Specificity        | Company            |
|----------|------------|--------------------|--------------------|
| E2F1     | 66515-1-Ig | Mouse monoclonal   | Proteintech, China |
| GINS2    | ab197123   | Rabbit, polyclonal | Abcam, USA         |
| PI3K     | 4292       | Rabbit, polyclonal | CST, USA           |
| p-PI3K   | 4228       | Rabbit, polyclonal | CST, USA           |
| AKT      | 9272       | Rabbit, polyclonal | CST, USA           |
| p-AKT    | 9271       | Rabbit, polyclonal | CST, USA           |
| mTOR     | 2972       | Rabbit, polyclonal | CST, USA           |
| p-mTOR   | 2971       | Rabbit, polyclonal | CST, USA           |
| CDK2     | 22060-AP   | Rabbit, polyclonal | Proteintech, China |
| CDK4     | 11026-1-AP | Rabbit, polyclonal | Proteintech, China |
| CCND1    | 60186-1-Ig | Mouse monoclonal   | Proteintech, China |
| VEGF     | 19003-1-AP | Rabbit, polyclonal | Proteintech, China |
| Ki-67    | ab15580    | Rabbit, polyclonal | Abcam, USA         |
| β-actin  | ab8227     | Rabbit, polyclonal | Abcam, USA         |

**Table S3.** Sequence of primers for ChIP assay

| GINS2-chip-primer | Sequence (5' to 3')     |
|-------------------|-------------------------|
| GINS2-E1-left     | GGCTGTCTACCGCCTTCCTATAG |
| GINS2-E1-right    | CAGAGCCTCACGGTCTCCTCG   |
| GINS2-E2-left     | CCCCACCCCGGCTCTTGATTAGG |
| GINS2-E2-right    | GGCGTGACCTGGCGCTGTCAG   |
| GINS2-E2-right    | GGCGTGACCTGGCGCTGTCAG   |
| GINS2-E3-right    | ATTCGGACACTTCAGAGCAGGAG |

**Table S4.** GINS2 expression associated with clinical pathological characteristics (logistic regression)

| Characteristics                                                | Total (N) | Odds Ratio (OR)     | P value |
|----------------------------------------------------------------|-----------|---------------------|---------|
| T stage (T2 & T3 & T4 vs. T1)                                  | 368       | 2.019 (1.336-3.067) | < 0.001 |
| N stage (N1 vs. N0)                                            | 256       | 0.924 (0.109-7.795) | 0.937   |
| M stage (M1 vs. M0)                                            | 270       | 0.305 (0.015-2.413) | 0.306   |
| Pathologic stage (Stage III & Stage IV vs. Stage I & Stage II) | 347       | 1.739 (1.072-2.850) | 0.026   |
| Tumor status (With tumor vs. Tumor free)                       | 352       | 1.758 (1.149-2.701) | 0.010   |
| Histologic grade (G3 & G4 vs. G1 & G2)                         | 366       | 2.710 (1.750-4.241) | < 0.001 |
| Vascular invasion (Yes vs. No)                                 | 315       | 1.352 (0.849-2.159) | 0.204   |

## GINS2 accelerates hepatocellular carcinoma

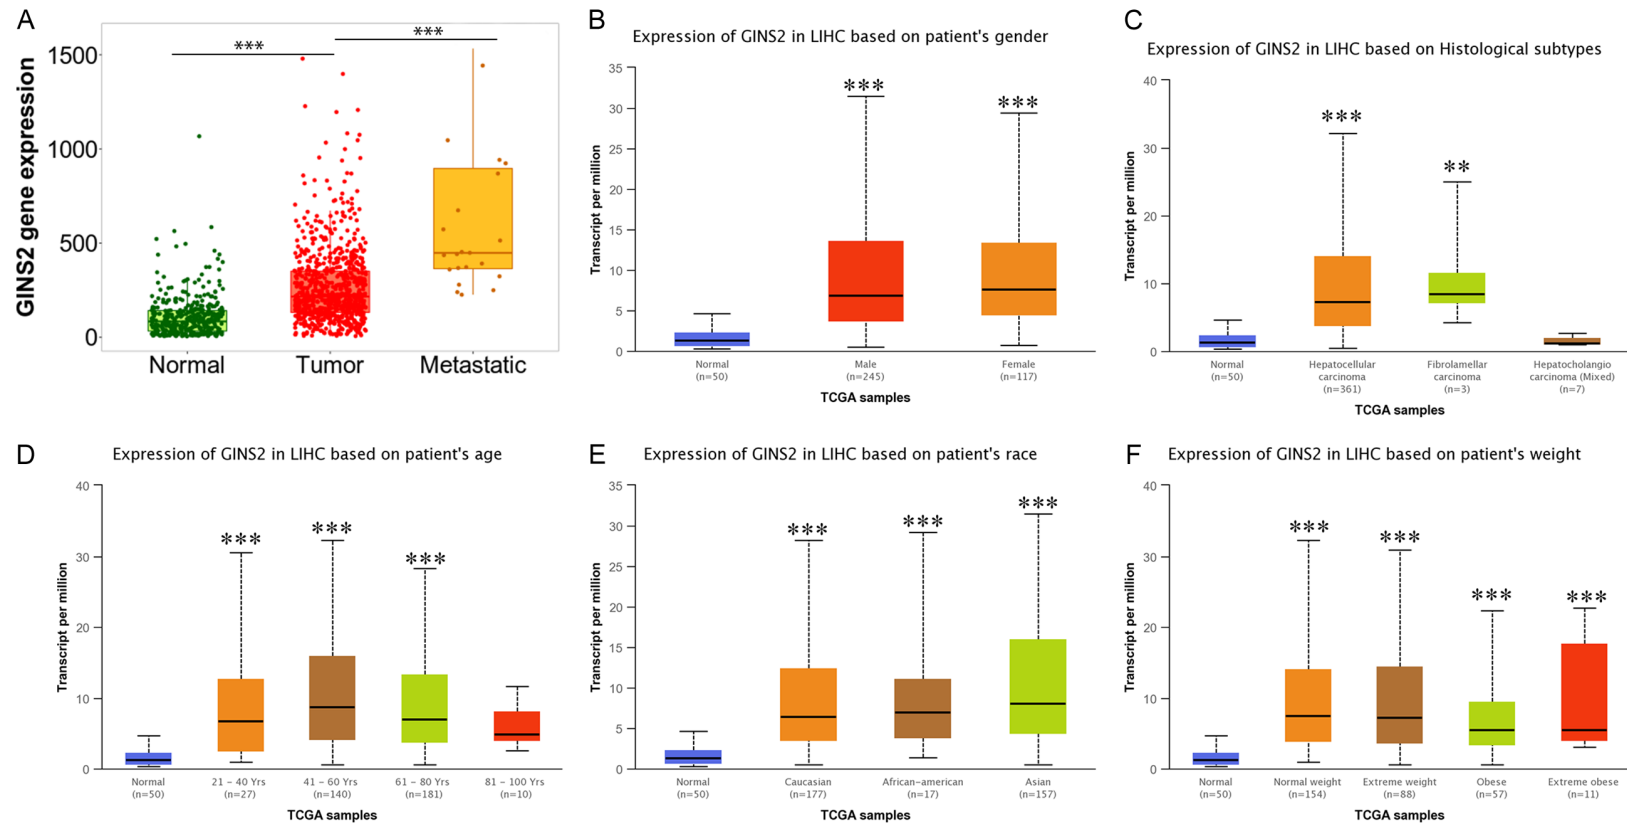

**Figure S1.** Box plot evaluating GINS2 expression in subgroups of LIHC samples (UALCAN and TNMplot). Upregulated mRNA of GINS2 is independent of patients' metastatic status (A), gender (B), histological subtypes (C), age (D), race (E), and weight (F). The t-test was used to estimate the significance of differences in gene expression levels between groups. \*P < 0.05; \*\*P < 0.01; \*\*\*P < 0.001.

## GINS2 accelerates hepatocellular carcinoma

**Table S5.** Univariate and multivariate Cox's regression analysis of factors associated with OS in HCC

| Characteristics      | Total (N) | Univariate analysis   |         | Multivariate analysis |         |
|----------------------|-----------|-----------------------|---------|-----------------------|---------|
|                      |           | Hazard ratio (95% CI) | P value | Hazard ratio (95% CI) | P value |
| Age                  | 370       |                       |         |                       |         |
| ≤ 60                 | 177       | Reference             |         |                       |         |
| > 60                 | 193       | 1.248 (0.880-1.768)   | 0.214   |                       |         |
| Gender               | 370       |                       |         |                       |         |
| Male                 | 249       | Reference             |         |                       |         |
| Female               | 121       | 1.225 (0.860-1.746)   | 0.260   |                       |         |
| Pathologic stage     | 346       |                       |         |                       |         |
| Stage I & Stage II   | 256       | Reference             |         |                       |         |
| Stage III & Stage IV | 90        | 2.449 (1.689-3.549)   | < 0.001 | 1.527 (0.208-11.194)  | 0.677   |
| T stage              | 367       |                       |         |                       |         |
| T1 & T2              | 274       | Reference             |         |                       |         |
| T3 & T4              | 93        | 2.540 (1.785-3.613)   | < 0.001 | 1.410 (0.192-10.359)  | 0.736   |
| N stage              | 256       |                       |         |                       |         |
| N0                   | 252       | Reference             |         |                       |         |
| N1                   | 4         | 2.004 (0.491-8.181)   | 0.333   |                       |         |
| M stage              | 270       |                       |         |                       |         |
| M0                   | 266       | Reference             |         |                       |         |
| M1                   | 4         | 4.032 (1.267-12.831)  | 0.018   | 1.870 (0.423-8.273)   | 0.409   |
| Tumor status         | 351       |                       |         |                       |         |
| Tumor free           | 201       | Reference             |         |                       |         |
| With tumor           | 150       | 2.361 (1.620-3.441)   | < 0.001 | 1.960 (1.226-3.133)   | 0.005   |
| Histologic grade     | 365       |                       |         |                       |         |
| G1 & G2              | 232       | Reference             |         |                       |         |
| G3 & G4              | 133       | 1.120 (0.781-1.606)   | 0.539   |                       |         |
| Vascular invasion    | 314       |                       |         |                       |         |
| No                   | 206       | Reference             |         |                       |         |
| Yes                  | 108       | 1.348 (0.890-2.042)   | 0.159   |                       |         |
| AFP (ng/ml)          | 277       |                       |         |                       |         |
| ≤ 400                | 213       | Reference             |         |                       |         |
| > 400                | 64        | 1.056 (0.646-1.727)   | 0.827   |                       |         |
| GINS2                | 370       |                       |         |                       |         |
| Low                  | 185       | Reference             |         |                       |         |
| High                 | 185       | 1.692 (1.193-2.399)   | 0.003   | 1.653 (1.023-2.671)   | 0.040   |

## GINS2 accelerates hepatocellular carcinoma

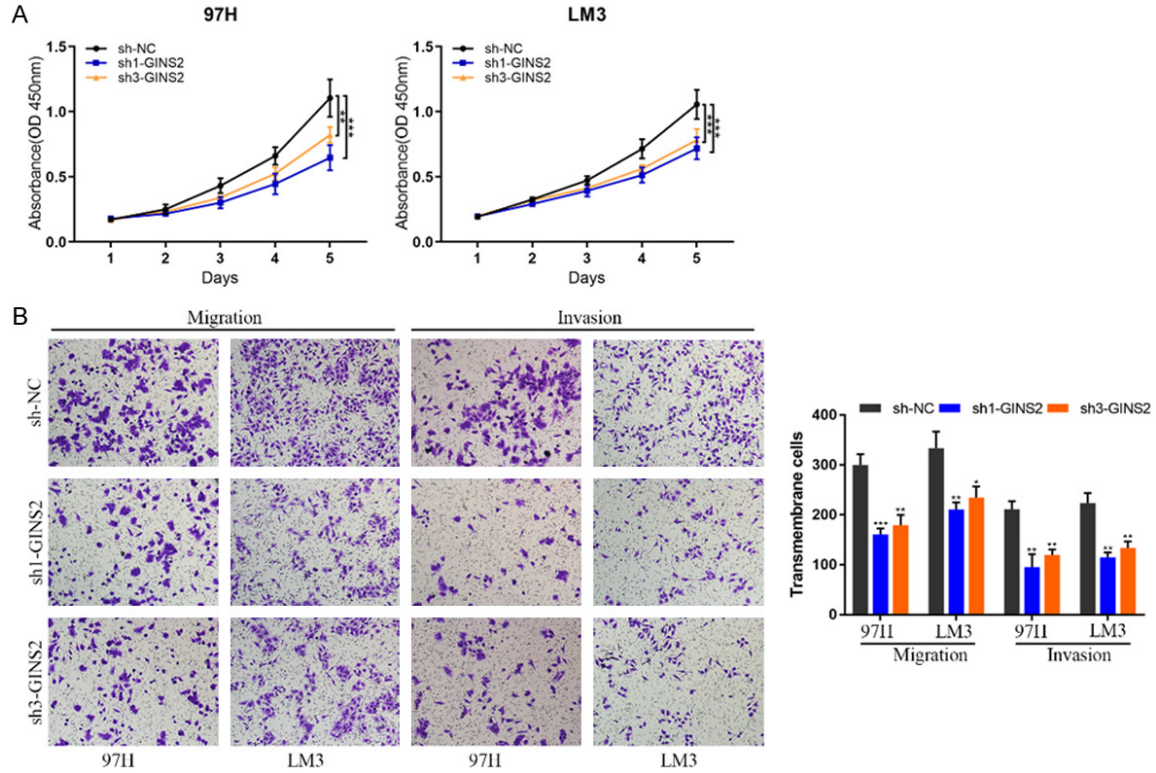

**Figure S2.** Knockdown of GINS2 suppresses cell proliferation, invasion, and migration of HCC cells *in vitro*. A. CCK-8 assay was performed in 97H and LM3 cells transfected with sh-NC, sh1-GINS2, or sh3-GINS2. B. Invasive or migrated cells were measured by transwell assay with or without matrigel. All data are represented as the means  $\pm$  S.E.M. \* $P < 0.05$ ; \*\* $P < 0.01$ ; \*\*\* $P < 0.001$ .

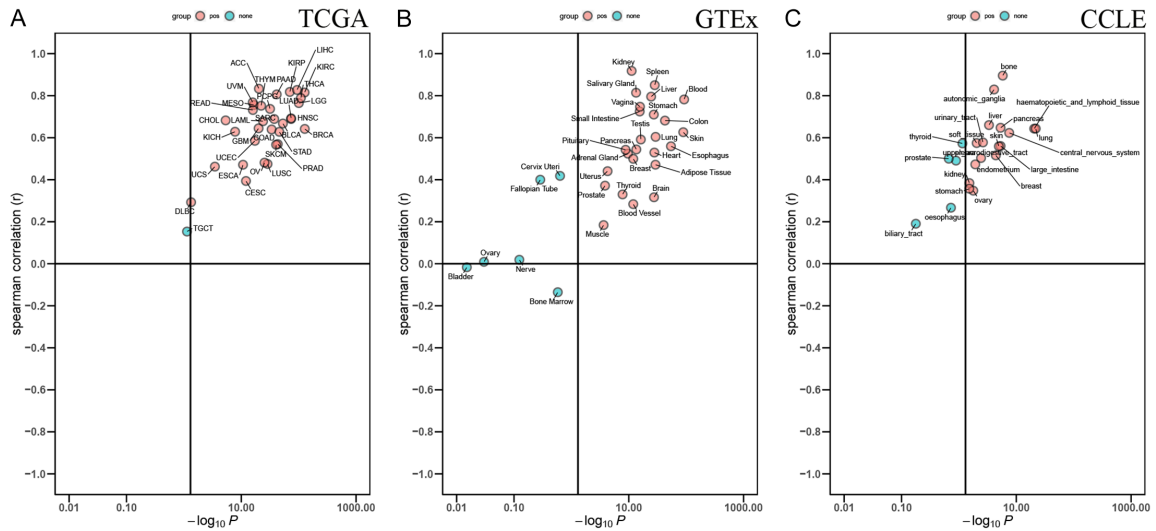

**Figure S3.** Correlation analysis of E2F1 and GINS2. The expression levels of E2F1 and GINS2 showed a strong positive correlation in the TCGA (A), GTEx (B), and CCLE (C) databases.

## GINS2 accelerates hepatocellular carcinoma

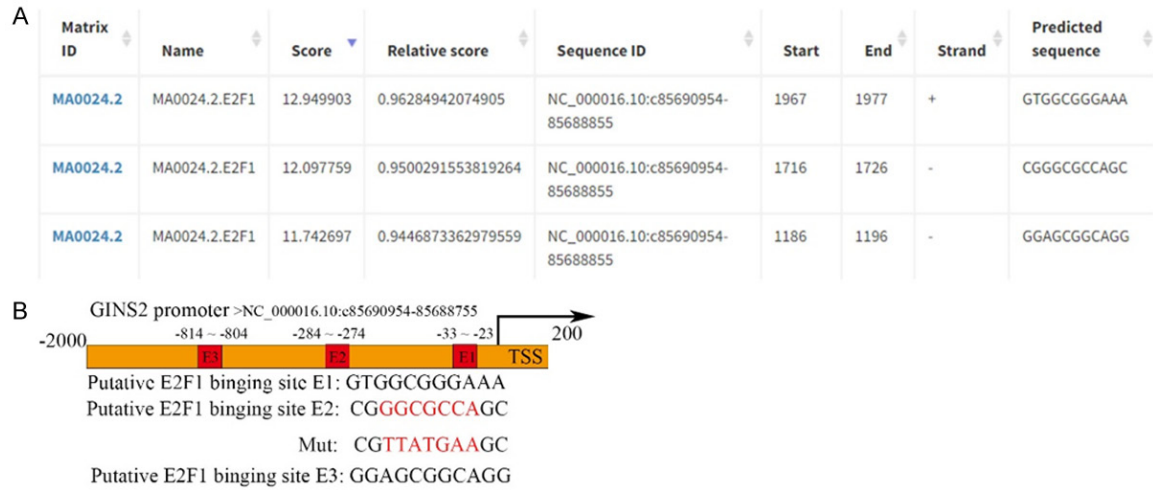

**Figure S4.** Potential E2F1 binding sequences on the GINS2 promoter regions. A. Three E2F1 binding sequences on the GINS2 promoter regions according to the JASPAR website. B. Mutant sequences used in the dual-luciferase reporter assay.
